# Supplementary material for: Escherichia/Shigella, SCFAs, and Metabolic Pathways—The Triad That Orchestrates Intestinal Dysbiosis in Patients with Decompensated Alcoholic Cirrhosis from Western Mexico
Source: MDPI journal article supplement (doi:10.3390/microorganisms10061231), 2022-06-16
Supplement: s1 [file s1]

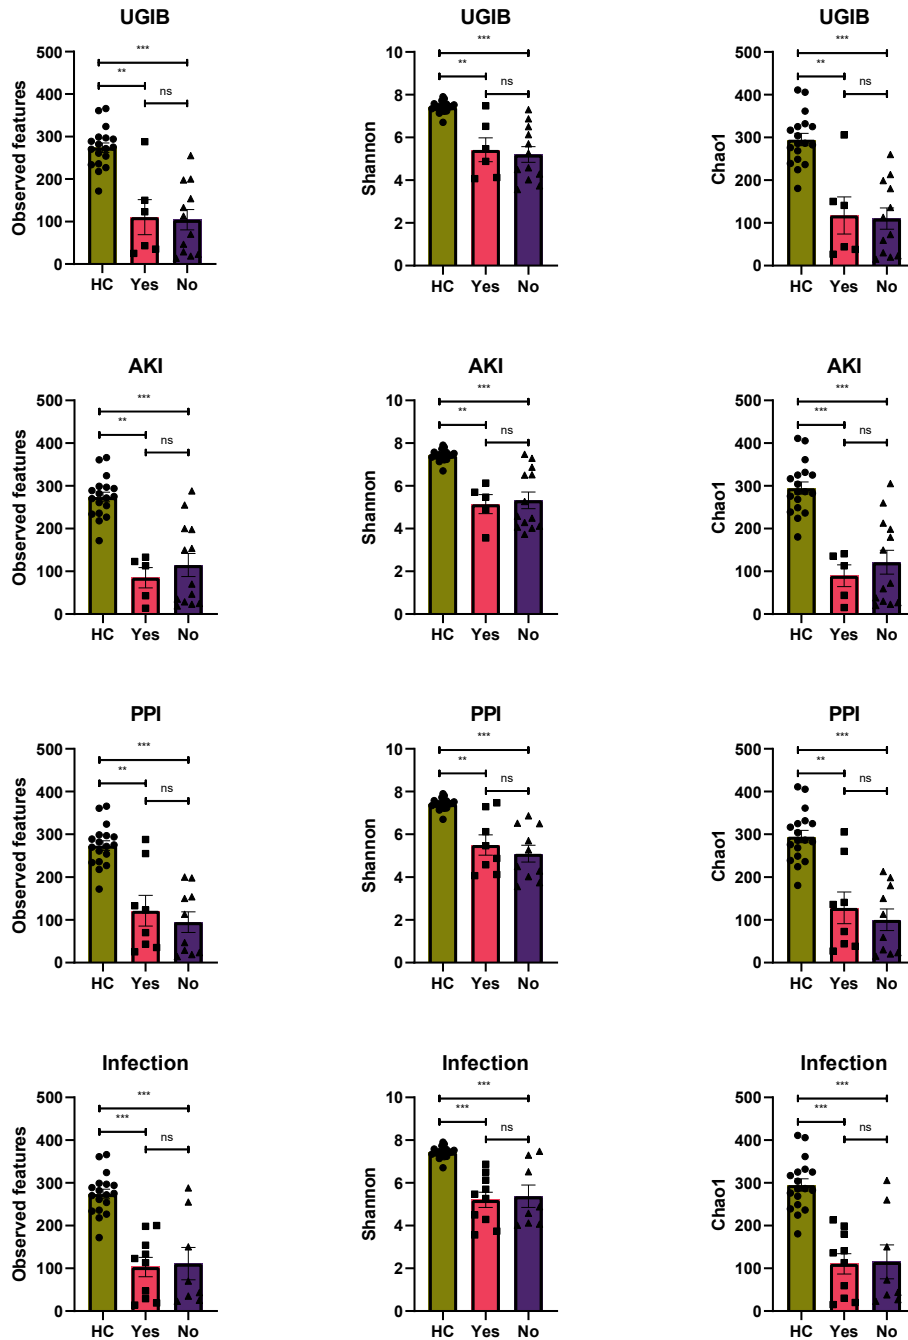

**Supplemental Figure S1: Alpha diversity metrics between healthy controls (HC) and subgroups of cirrhotic patients.** The figure shows alpha diversity indices for patients subgrouped by clinical settings: UGIB (upper gastrointestinal bleeding), AKI (acute kidney injury), PPI (proton pump inhibitors usage) or infection at admission. No significant differences were found among patients subgroups. Results are expressed as mean  $\pm$  SEM. Analyzed by Kruskal-Wallis test plus Benjamini, Krieger and Yekutieli method for multiple comparisons. \*\*  $p < 0.01$ , \*\*\*  $p < 0.001$ , ns: not significant.

**Supplemental Table S1: Statistical significance in beta diversity metrics between healthy controls (HC) and subgroups of cirrhotic patients.**

| <b>Pairwise PERMANOVA results with Benjamini-Hochberg multiple testing corrections</b> |            |                   |                 |                 |
|----------------------------------------------------------------------------------------|------------|-------------------|-----------------|-----------------|
| <b>Weighted UniFrac distance</b>                                                       |            |                   |                 |                 |
| Group 1                                                                                | Group 2    | Pseudo-F          | <i>p</i> -value | <i>q</i> -value |
| <b>UGIB</b>                                                                            |            |                   |                 |                 |
| HC                                                                                     | No         | 4.00684379        | 0.001           | 0.0015          |
| HC                                                                                     | Yes        | 8.16378484        | 0.001           | 0.0015          |
| <u>No</u>                                                                              | <u>Yes</u> | <u>0.53754516</u> | <u>0.789</u>    | <u>0.789</u>    |
| <b>AKI</b>                                                                             |            |                   |                 |                 |
| HC                                                                                     | No         | 5.09231           | 0.001           | 0.0015          |
| HC                                                                                     | Yes        | 10.925914         | 0.001           | 0.0015          |
| <u>No</u>                                                                              | <u>Yes</u> | <u>2.012356</u>   | <u>0.083</u>    | <u>0.083</u>    |
| <b>PPI usage</b>                                                                       |            |                   |                 |                 |
| HC                                                                                     | No         | 4.874918          | 0.001           | 0.0015          |
| HC                                                                                     | Yes        | 5.53117           | 0.001           | 0.0015          |
| <u>No</u>                                                                              | <u>Yes</u> | <u>0.396942</u>   | <u>0.919</u>    | <u>0.919</u>    |
| <b>Infection</b>                                                                       |            |                   |                 |                 |
| HC                                                                                     | No         | 5.07362           | 0.001           | 0.0015          |
| HC                                                                                     | Yes        | 5.397498          | 0.001           | 0.0015          |
| <u>No</u>                                                                              | <u>Yes</u> | <u>0.449855</u>   | <u>0.879</u>    | <u>0.879</u>    |
| <b>Unweighted UniFrac distance</b>                                                     |            |                   |                 |                 |
| Group 1                                                                                | Group 2    | Pseudo-F          | <i>p</i> -value | <i>q</i> -value |
| <b>UGIB</b>                                                                            |            |                   |                 |                 |
| HC                                                                                     | No         | 5.51644845        | 0.001           | 0.0015          |
| HC                                                                                     | Yes        | 3.88655291        | 0.001           | 0.0015          |
| <u>No</u>                                                                              | <u>Yes</u> | <u>0.64289723</u> | <u>0.891</u>    | <u>0.891</u>    |
| <b>AKI</b>                                                                             |            |                   |                 |                 |
| HC                                                                                     | No         | 5.43499453        | 0.001           | 0.0015          |
| HC                                                                                     | Yes        | 4.2303456         | 0.001           | 0.0015          |
| <u>No</u>                                                                              | <u>Yes</u> | <u>0.92991691</u> | <u>0.415</u>    | <u>0.415</u>    |
| <b>PPI usage</b>                                                                       |            |                   |                 |                 |
| HC                                                                                     | No         | 5.57567668        | 0.001           | 0.0015          |
| HC                                                                                     | Yes        | 4.25779142        | 0.001           | 0.0015          |
| <u>No</u>                                                                              | <u>Yes</u> | <u>0.91627568</u> | <u>0.447</u>    | <u>0.447</u>    |
| <b>Infection</b>                                                                       |            |                   |                 |                 |
| HC                                                                                     | No         | 4.73186942        | 0.001           | 0.0015          |
| HC                                                                                     | Yes        | 4.7676101         | 0.001           | 0.0015          |
| <u>No</u>                                                                              | <u>Yes</u> | <u>0.54556854</u> | <u>0.982</u>    | <u>0.982</u>    |

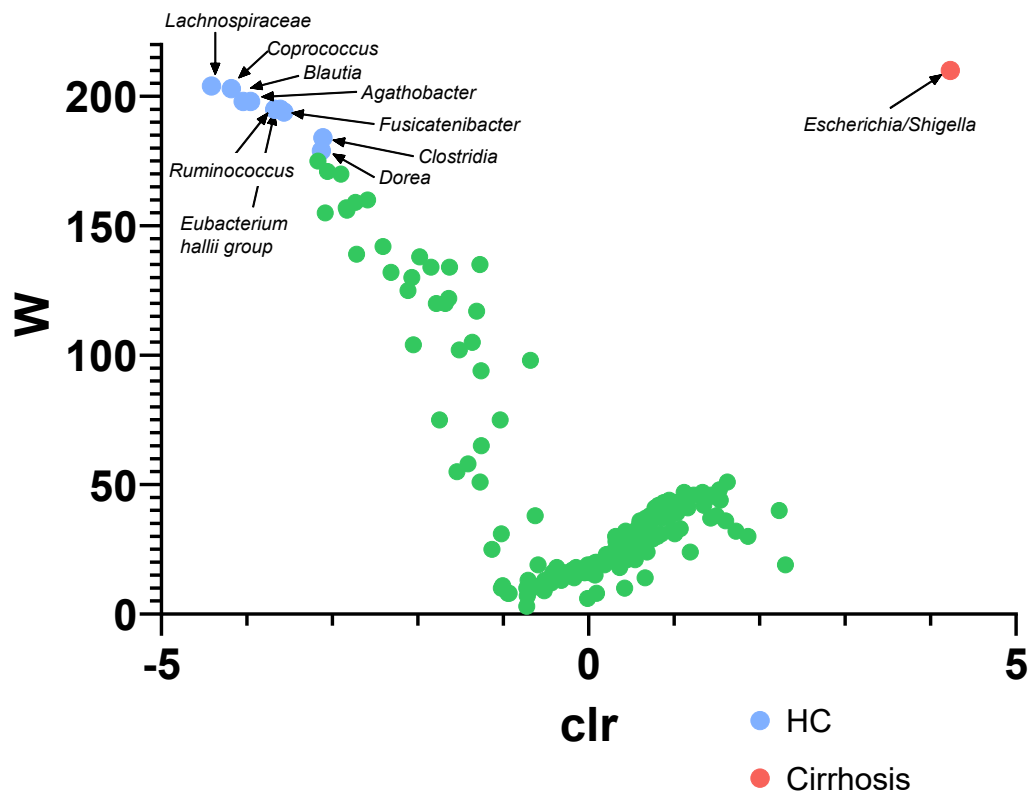

**Supplemental Figure S2:** Volcano plot depiction of ANCOM analysis. The horizontal axis is the centered log ratio transformation (clr) representative of the difference in abundance of a significant taxonomical unit between healthy controls (HC, blue dots) and patients with cirrhotic (red dots). A green color indicates an overlap of ASVs between groups. The W statistic indicates the value of the statistical test corresponding to the number of times the null hypothesis was rejected for each taxonomical class.
